# Supplementary material for: Characterization of the particle size distribution, mineralogy, and Fe mode of occurrence of dust-emitting sediments from the Mojave Desert, California, USA
Source: Copernicus journal article supplement (doi:10.5194/acp-24-9155-2024), 2024-08-22
Supplement: Supplementary file 1 [file acp-24-9155-2024-supplement.pdf]

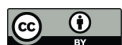

*Supplement of*

## **Characterization of the particle size distribution, mineralogy, and Fe mode of occurrence of dust-emitting sediments from the Mojave Desert, California, USA**

**Adolfo González-Romero et al.**

*Correspondence to:* Adolfo González-Romero (agonzal3@bsc.es) and Xavier Querol (xavier.querol@idaea.csic.es)

The copyright of individual parts of the supplement might differ from the article licence.

Supplementary

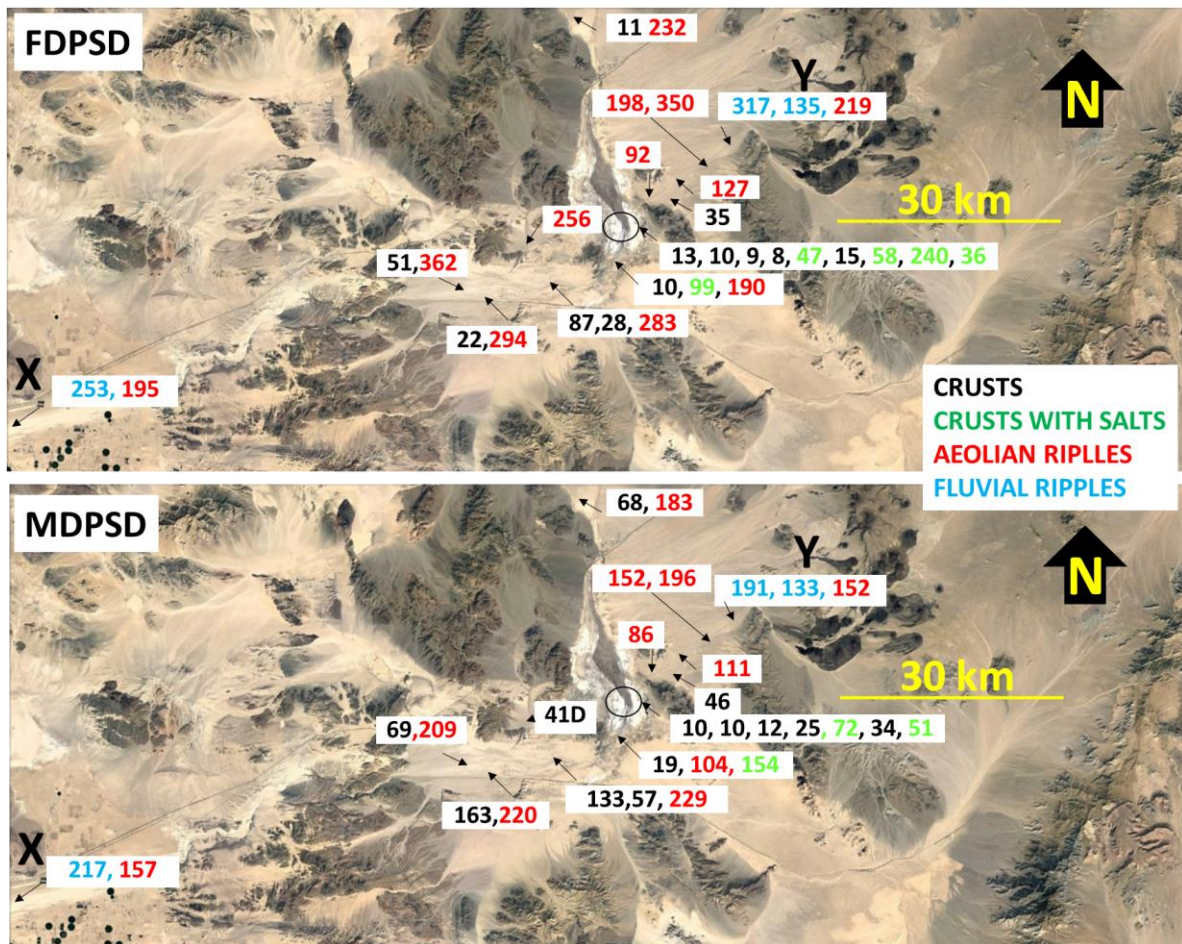

Figure S1: Soda Lake basin scale map with median particle diameter analysed with fully dispersed methodology (upper panel) and minimally dispersed methodology (lower panel) of different type of samples. Basemap: Imagery data from © Google Earth Pro v: 7.3.6.9345.

Table S1. Mean particle diameter from the samples of the Mojave Desert. N° indicates the number of the sample, Lat. is the latitude, Long. is the longitude. Type is the type of the sample being C: Crust and R: Ripple. Basin indicates the basin name where sample was obtained from. MDPSD is the minimally dispersed particle size distribution and FDPD is the Fully dispersed particle size distribution.

| N° | Lat.  | Long.   | Type | Basin    | mean diameter MDPSD ( $\mu\text{m}$ ) | mean diameter FDPD ( $\mu\text{m}$ ) |
|----|-------|---------|------|----------|---------------------------------------|--------------------------------------|
| 1  | 35.04 | -116.24 | C    | Soda     | 69                                    | 51                                   |
| 2  | 35.04 | -116.24 | R    | Soda     | 209                                   | 362                                  |
| 3  | 35.05 | -116.19 | C    | Soda     | 163                                   | 22                                   |
| 4  | 35.04 | -116.19 | R    | Soda     | 220                                   | 294                                  |
| 5  | 35.04 | -116.19 | C    | Soda     | 133                                   | 87                                   |
| 6  | 35.04 | -116.12 | R    | Soda     | 229                                   | 283                                  |
| 7  | 35.04 | -116.12 | C    | Soda     | 57                                    | 28                                   |
| 8  | 35.04 | -116.10 | C    | Soda     | 19                                    | 9.8                                  |
| 9  | 35.04 | -116.10 | C    | Soda     | 104                                   | 99                                   |
| 10 | 35.04 | -116.10 | R    | Soda     | 154                                   | 190                                  |
| 11 | 35.72 | -115.58 | C    | Mesquite | 64                                    | 91                                   |
| 12 | 35.72 | -115.58 | R    | Mesquite | 88                                    | 107                                  |
| 14 | 35.72 | -115.61 | C    | Mesquite | 313                                   | 46                                   |
| 15 | 35.72 | -115.61 | R    | Mesquite | 453                                   | 28                                   |
| 16 | 35.71 | -115.61 | C    | Mesquite | 138                                   | 16                                   |
| 17 | 35.71 | -115.61 | C    | Mesquite | 76                                    | 28                                   |
| 18 | 35.71 | -115.61 | C    | Mesquite | 35                                    | 14                                   |
| 19 | 35.70 | -115.60 | C    | Mesquite | 33                                    | 35                                   |
| 20 | 35.75 | -115.61 | C    | Mesquite | 180                                   | 11                                   |
| 21 | 35.54 | -115.41 | C    | Ivanpah  | 30                                    | 12                                   |
| 22 | 35.34 | -116.09 | C    | Soda     | 68                                    | 11                                   |
| 23 | 35.34 | -116.09 | R    | Soda     | 183                                   | 232                                  |
| 24 | 35.21 | -115.92 | R    | Soda     | 191                                   | 317                                  |

|    |       |         |   |         |         |     |
|----|-------|---------|---|---------|---------|-----|
| 25 | 35.21 | -115.92 | R | Soda    | 133     | 135 |
| 26 | 35.20 | -115.93 | R | Soda    | 152     | 219 |
| 27 | 35.17 | -115.98 | R | Soda    | 152     | 198 |
| 28 | 35.17 | -115.99 | R | Soda    | 196     | 351 |
| 29 | 35.16 | -116.03 | R | Soda    | 111     | 127 |
| 30 | 35.16 | -116.03 | C | Soda    | 46      | 35  |
| 31 | 35.16 | -116.03 | C | Soda    | 86      | 92  |
| 32 | 35.16 | -116.03 | C | Soda    | 10      | 13  |
| 33 | 35.16 | -116.04 | C | Soda    | 10      | 10  |
| 34 | 35.16 | -116.04 | C | Soda    | 12      | 9.2 |
| 35 | 35.16 | -116.04 | C | Soda    | 25      | 8.4 |
| 36 | 35.16 | -116.04 | C | Soda    | 72      | 47  |
| 37 | 35.15 | -116.06 | C | Soda    | 34      | 15  |
| 38 | 35.14 | -116.08 | C | Soda    | 51      | 58  |
| 39 | 35.13 | -116.10 | C | Soda    | Not An. | 240 |
| 40 | 35.13 | -116.10 | C | Soda    | Not An. | 136 |
| 41 | 35.12 | -116.11 | R | Soda    | 211     | 256 |
| 42 | 35.13 | -116.28 | C | Cronese | 24      | 9.4 |
| 43 | 35.13 | -116.28 | C | Cronese | 42      | 9.5 |
| 44 | 35.13 | -116.28 | C | Cronese | 67      | 8.2 |
| 45 | 35.12 | -116.28 | C | Cronese | 82      | 6.6 |
| 46 | 35.11 | -116.27 | C | Cronese | 49      | 20  |
| 47 | 35.11 | -116.27 | R | Cronese | 165     | 147 |
| 48 | 35.14 | -116.32 | C | Cronese | 123     | 13  |
| 49 | 35.14 | -116.32 | C | Cronese | 71      | 5.5 |
| 50 | 35.14 | -116.31 | R | Cronese | 220     | 77  |
| 51 | 35.14 | -116.29 | C | Cronese | 279     | 325 |
| 52 | 35.14 | -116.29 | C | Cronese | 167     | 4.9 |
| 53 | 35.07 | -116.73 | C | Coyote  | 79      | 8.4 |
| 54 | 35.07 | -116.73 | R | Coyote  | 153     | 156 |

|    |       |         |   |      |     |     |
|----|-------|---------|---|------|-----|-----|
| 55 | 34.91 | -116.68 | R | Soda | 217 | 253 |
| 56 | 34.91 | -116.68 | R | Soda | 157 | 195 |

Table S2. Summarised results of the % of mass from each dry sieved size fraction.

|                             |                       |       |       |           |       |       |       |           |       |       |           |
|-----------------------------|-----------------------|-------|-------|-----------|-------|-------|-------|-----------|-------|-------|-----------|
| Fractions (% of total mass) | <b>Sample</b>         | 5     | 7     | 10        | 11    | 14    | 17    | 19        | 21    | 22    | 26        |
|                             | <b>Type</b>           | Crust | Crust | A. Ripple | Crust | Crust | Crust | Crust     | Crust | Crust | A. Ripple |
|                             | 250-500 $\mu\text{m}$ | 22    | 24    | 22        | 15    | 53    | 29    | 20        | 29    | 29    | 31        |
|                             | 80-250 $\mu\text{m}$  | 50    | 38    | 73        | 50    | 36    | 44    | 45        | 62    | 35    | 63        |
|                             | 63-80 $\mu\text{m}$   | 8,5   | 12    | 3,1       | 10    | 2,8   | 7,8   | 5,7       | 0,4   | 6,0   | 3,7       |
|                             | 40-63 $\mu\text{m}$   | 9,7   | 15    | 0,97      | 13    | 4,6   | 11    | 19        | 0,9   | 14,7  | 1,8       |
|                             | 20-40 $\mu\text{m}$   | 4,8   | 6,7   | <0,1      | 8,2   | 2,3   | 5,5   | 6,2       | 2,8   | 8,1   | 0,89      |
| <20 $\mu\text{m}$           | 4,8                   | 3,7   | <0,1  | 3,8       | 1,4   | 2,5   | 3,7   | 5,2       | 7,6   | 0,11  |           |
| Fractions (% of total mass) | <b>Sample</b>         | 32    | 35    | 38        | 42    | 46    | 48    | 50        | 52    | 53    | 55        |
|                             | <b>Type</b>           | Crust | Crust | Crust     | Crust | Crust | Crust | A. Ripple | Crust | Crust | A. Ripple |
|                             | 250-500 $\mu\text{m}$ | 21    | 21    | 12        | 34    | 15    | 44    | 36        | 44    | 35    | 35        |
|                             | 80-250 $\mu\text{m}$  | 73    | 67    | 66        | 54    | 68    | 49    | 60        | 47    | 56    | 64        |
|                             | 63-80 $\mu\text{m}$   | 0,32  | 2,8   | 4,4       | 0,42  | 2,5   | 1,1   | 0,58      | 1,9   | 2,1   | 1,0       |
|                             | 40-63 $\mu\text{m}$   | 1,7   | 5,8   | 9,9       | 2,9   | 7,7   | 4,9   | 1,5       | 3,9   | 4,8   | 0,47      |
|                             | 20-40 $\mu\text{m}$   | 2,6   | 3,2   | 5,8       | 4,2   | 3,1   | 0,26  | 1,0       | 1,6   | 2,1   | <0,1      |
| <20 $\mu\text{m}$           | 1,6                   | 0,84  | 1,8   | 5,2       | 3,2   | 0,56  | 1,0   | 0,69      | 0,80  | <0,1  |           |







|    |      |      |      |      |     |      |     |      |      |      |      |      |      |      |      |      |     |
|----|------|------|------|------|-----|------|-----|------|------|------|------|------|------|------|------|------|-----|
| 53 | 11.4 | 29.1 | 8.2  | 5.0  | 9.7 | 13.5 | 5.6 | <0.1 | 8.5  | 7.2  | <0.1 | 1.2  | <0.1 | <0.1 | <0.1 | <0.1 | 0.5 |
| 54 | 27.9 | 44.1 | 8.1  | 1.2  | 4.2 | 5.8  | 3.5 | <0.1 | 2.3  | 2.3  | <0.1 | <0.1 | <0.1 | <0.1 | <0.1 | <0.1 | 0.6 |
| 55 | 41.1 | 38.5 | 10.1 | <0.1 | 3.0 | 2.5  | 4.2 | <0.1 | <0.1 | <0.1 | <0.1 | <0.1 | <0.1 | <0.1 | <0.1 | <0.1 | 0.7 |
| 56 | 35.3 | 44.1 | 8.3  | <0.1 | 0.8 | 4.5  | 6.5 | <0.1 | <0.1 | <0.1 | <0.1 | 0.2  | <0.1 | <0.1 | <0.1 | <0.1 | 0.2 |

Table S4. Summarised mineralogy of the dry sieved size fractions of 20 selected samples. The mineralogy results show weight %.

| Nº | Fractions  | Quartz | Feldspars | Carbonates | Clays | Amphibole | Zeolites | Na-Salts | Gypsum | Fe-Oxides |
|----|------------|--------|-----------|------------|-------|-----------|----------|----------|--------|-----------|
| 5  | 250-500 µm | 37     | 46        | 2.0        | 13    | 1.9       | <0.1     | <0.1     | <0.1   | 0.48      |
|    | 80-250 µm  | 25     | 53        | 3.3        | 13    | 5.4       | <0.1     | <0.1     | <0.1   | 1.2       |
|    | 63-80 µm   | 19     | 54        | 2.4        | 14    | 8.5       | <0.1     | <0.1     | <0.1   | 1.8       |
|    | 40-63 µm   | 21     | 42        | 2.3        | 21    | 12        | <0.1     | <0.1     | <0.1   | 1.7       |
|    | 20-40 µm   | 16     | 45        | 4.1        | 26    | 8.0       | <0.1     | <0.1     | <0.1   | 0.63      |
|    | <20 µm     | 19     | 34        | 7.2        | 35    | 3.4       | <0.1     | <0.1     | <0.1   | 1.4       |
| 7  | 250-500 µm | 15     | 35        | 4.6        | 34    | 2.9       | 4.9      | <0.1     | <0.1   | 3.7       |
|    | 80-250 µm  | 20     | 32        | 3.0        | 33    | 4.8       | 4.8      | <0.1     | <0.1   | 2.3       |
|    | 63-80 µm   | 16     | 29        | 3.8        | 38    | 6.8       | 4.8      | <0.1     | <0.1   | 2.0       |
|    | 40-63 µm   | 14     | 34        | 4.1        | 36    | 4.7       | 4.8      | <0.1     | <0.1   | 2.2       |
|    | 20-40 µm   | 11     | 38        | 4.2        | 39    | 3.0       | 3.1      | <0.1     | <0.1   | 2.0       |
|    | <20 µm     | 15     | 33        | 4.2        | 34    | 7.4       | 4.8      | <0.1     | <0.1   | 2.2       |
| 10 | 250-500 µm | 59     | 35        | 0.36       | 4.1   | 0.41      | <0.1     | <0.1     | <0.1   | 0.48      |
|    | 80-250 µm  | 43     | 48        | 0.36       | 4.5   | 3.8       | <0.1     | <0.1     | <0.1   | 0.18      |
|    | 63-80 µm   | 24     | 54        | 1.3        | 10    | 9.9       | <0.1     | <0.1     | <0.1   | 0.96      |
|    | 40-63 µm   | 31     | 43        | 1.8        | 6.3   | 16        | <0.1     | <0.1     | <0.1   | 2.8       |
| 11 | 250-500 µm | 21     | 27        | 3.9        | 19    | 7.0       | 1        | 18       | 2.0    | 1.1       |
|    | 80-250 µm  | 28     | 33        | 6.1        | 18    | 6.8       | 2        | 4.8      | 1.1    | 0.64      |
|    | 63-80 µm   | 25     | 37        | 6.0        | 17    | 9.6       | 2        | 1.3      | 0.98   | 0.96      |
|    | 40-63 µm   | 29     | 26        | 3.4        | 26    | 9.0       | 2        | 2.0      | 1.2    | 1.2       |
|    | 20-40 µm   | 16     | 28        | 3.6        | 36    | 7.9       | 2        | 5.1      | 1.2    | 1.2       |
|    | <20 µm     | 7.1    | 21        | 5.0        | 51    | 3.8       | 2        | 6.8      | 0.72   | 1.9       |
| 14 | 250-500 µm | 5.3    | 17        | 4.7        | 19    | 4.6       | <0.1     | 8.5      | 37     | 4.0       |
|    | 80-250 µm  | 2.3    | 29        | 5.7        | 16    | 5.0       | <0.1     | 8.7      | 31     | 1.5       |
|    | 63-80 µm   | 21     | 29        | 1.4        | 22    | 8.3       | <0.1     | 8.3      | 9.7    | 0.24      |
|    | 40-63 µm   | 17     | 35        | 4.3        | 18    | 6.6       | <0.1     | 10       | 7.6    | 1.8       |
|    | 20-40 µm   | 9.1    | 22        | 5.1        | 40    | 5.2       | <0.1     | 13       | 4.7    | 1.2       |
| 17 | 250-500 µm | 12     | 26        | 2.3        | 9     | 3.9       | 0.94     | 39       | 6.6    | 1.1       |
|    | 80-250 µm  | 15     | 25        | 4.1        | 9     | 5.3       | 1        | 36       | 2.9    | 1.1       |
|    | 63-80 µm   | 25     | 38        | 5.8        | 8     | 5.9       | 0.59     | 15       | 1.2    | 1.1       |
|    | 40-63 µm   | 22     | 33        | 5.2        | 15    | 9.2       | 0.96     | 14       | 0.72   | 0.96      |
|    | 20-40 µm   | 19     | 35        | 5.3        | 15    | 8.3       | 1.5      | 12       | 0.95   | 2.4       |
|    | <20 µm     | 14     | 37        | 7.8        | 25    | 5.9       | 1.4      | 6        | 0.59   | 1.7       |
| 19 | 250-500 µm | 22     | 36        | 16         | 20    | 5.5       | <0.1     | <0.1     | <0.1   | 1.3       |
|    | 80-250 µm  | 33     | 32        | 11         | 16    | 6.9       | <0.1     | <0.1     | <0.1   | 0.91      |
|    | 63-80 µm   | 32     | 33        | 11         | 14    | 8.4       | <0.1     | <0.1     | <0.1   | 1.4       |
|    | 40-63 µm   | 29     | 35        | 6.9        | 20    | 6.8       | <0.1     | <0.1     | <0.1   | 2.1       |
|    | 20-40 µm   | 24     | 33        | 14         | 20    | 6.4       | <0.1     | <0.1     | <0.1   | 2.9       |
|    | <20 µm     | 21     | 29        | 18         | 24    | 5.3       | <0.1     | <0.1     | <0.1   | 2.8       |
| 21 | 250-500 µm | 18     | 40        | 5.0        | 31    | 3.7       | <0.1     | <0.1     | <0.1   | 2.4       |
|    | 80-250 µm  | 24     | 36        | 3.9        | 29    | 3.6       | <0.1     | <0.1     | <0.1   | 3.5       |
|    | 63-80 µm   | 24     | 28        | 5.6        | 36    | 4.8       | <0.1     | <0.1     | <0.1   | 1.9       |
|    | 40-63 µm   | 20     | 37        | 6.9        | 26    | 7.3       | <0.1     | <0.1     | <0.1   | 3.1       |
|    | 20-40 µm   | 18     | 34        | 7.1        | 34    | 3.8       | <0.1     | <0.1     | <0.1   | 3.1       |
|    | <20 µm     | 21     | 32        | 3.2        | 39    | 1.8       | <0.1     | <0.1     | <0.1   | 3.2       |
| 22 | 250-500 µm | 23     | 34        | 5.4        | 32    | 4.7       | <0.1     | <0.1     | <0.1   | 1.8       |
|    | 80-250 µm  | 20     | 44        | 4.3        | 22    | 7.7       | <0.1     | <0.1     | <0.1   | 2.0       |
|    | 63-80 µm   | 21     | 35        | 6.3        | 30    | 4.1       | <0.1     | <0.1     | <0.1   | 4.0       |
|    | 40-63 µm   | 20     | 34        | 6.4        | 31    | 4.0       | <0.1     | <0.1     | <0.1   | 4.1       |
|    | 20-40 µm   | 21     | 33        | 4.1        | 33    | 6.8       | <0.1     | <0.1     | <0.1   | 2.4       |
|    | <20 µm     | 17     | 39        | 2.8        | 33    | 5.7       | <0.1     | <0.1     | <0.1   | 2.5       |
| 26 | 250-500 µm | 53     | 41        | <0.1       | 5.2   | 0.71      | <0.1     | <0.1     | <0.1   | 0.47      |
|    | 80-250 µm  | 43     | 48        | <0.1       | 5.8   | 2.6       | <0.1     | <0.1     | <0.1   | 0.54      |
|    | 63-80 µm   | 29     | 52        | <0.1       | 8.2   | 11        | <0.1     | <0.1     | <0.1   | 0.47      |
|    | 40-63 µm   | 24     | 48        | <0.1       | 14    | 11        | <0.1     | 1        | <0.1   | 1.6       |
| 32 | 250-500 µm | 6.2    | 56        | 7.4        | 25    | 4.1       | <0.1     | <0.1     | <0.1   | 1.9       |
|    | 80-250 µm  | 17     | 50        | 5.5        | 21    | 5.2       | <0.1     | <0.1     | <0.1   | 2.1       |
|    | 63-80 µm   | 15     | 35        | 5.5        | 37    | 6.0       | <0.1     | <0.1     | <0.1   | 1.1       |
|    | 40-63 µm   | 9.0    | 58        | 6.5        | 18    | 7.2       | <0.1     | <0.1     | <0.1   | 1.4       |
|    | 20-40 µm   | 3.4    | 56        | 8.2        | 26    | 3.2       | <0.1     | <0.1     | <0.1   | 2.9       |
|    | <20 µm     | 11     | 41        | 11         | 33    | 2.0       | <0.1     | <0.1     | <0.1   | 1.6       |
| 35 | 250-500 µm | 16     | 41        | 4.4        | 21    | 4.9       | 1.2      | 9.3      | 0.95   | 1.2       |
|    | 80-250 µm  | 16     | 51        | 3.1        | 17    | 5.6       | 1.2      | 3.5      | 0.72   | 1.5       |

|    |                       |     |    |      |     |      |      |      |      |      |
|----|-----------------------|-----|----|------|-----|------|------|------|------|------|
|    | 63-80 $\mu\text{m}$   | 15  | 52 | 2.6  | 15  | 9.1  | 1.1  | 2.4  | 1.2  | 1.4  |
|    | 40-63 $\mu\text{m}$   | 13  | 51 | 1.6  | 17  | 12   | 1.1  | 2.3  | 1.1  | 1.6  |
|    | 20-40 $\mu\text{m}$   | 2.5 | 46 | 6.5  | 31  | 6.2  | 0.36 | 5.6  | 0.60 | 1.8  |
|    | <20 $\mu\text{m}$     | 6.8 | 37 | 8.2  | 36  | 3.1  | 2.5  | 3.9  | 0.48 | 1.4  |
| 38 | 250-500 $\mu\text{m}$ | 17  | 42 | 2.4  | 9.3 | 5.8  | 1.2  | 22   | <0.1 | 0.67 |
|    | 80-250 $\mu\text{m}$  | 19  | 54 | 1.9  | 9.0 | 8.4  | 0.84 | 5.9  | <0.1 | 0.96 |
|    | 63-80 $\mu\text{m}$   | 24  | 58 | 0.83 | 5.9 | 7.1  | 0.83 | 3.6  | <0.1 | 0.36 |
|    | 40-63 $\mu\text{m}$   | 23  | 47 | 2.8  | 8.5 | 10   | 1.3  | 5.8  | <0.1 | 0.84 |
|    | 20-40 $\mu\text{m}$   | 17  | 44 | 3.5  | 12  | 10   | 0.82 | 12   | <0.1 | 1.1  |
|    | <20 $\mu\text{m}$     | 16  | 37 | 4.4  | 16  | 7.6  | 2.0  | 15   | <0.1 | 1.4  |
| 42 | 250-500 $\mu\text{m}$ | 6.1 | 46 | 6.7  | 34  | 3.9  | 2.4  | <0.1 | <0.1 | 1.6  |
|    | 80-250 $\mu\text{m}$  | 4.1 | 48 | 7.0  | 31  | 3.9  | 3.4  | <0.1 | <0.1 | 2.3  |
|    | 63-80 $\mu\text{m}$   | 5.5 | 55 | 4.7  | 28  | 2.9  | 2.0  | <0.1 | <0.1 | 1.4  |
|    | 40-63 $\mu\text{m}$   | 12  | 49 | 4.8  | 27  | 2.6  | 2.4  | <0.1 | <0.1 | 2.6  |
|    | 20-40 $\mu\text{m}$   | 11  | 52 | 6.1  | 24  | 3.2  | 3.1  | <0.1 | <0.1 | 1.7  |
|    | <20 $\mu\text{m}$     | 16  | 44 | 6.2  | 26  | 3.6  | 2.9  | <0.1 | <0.1 | 1.4  |
| 46 | 250-500 $\mu\text{m}$ | 13  | 51 | 4.5  | 23  | 3.4  | 2.0  | <0.1 | <0.1 | 2.2  |
|    | 80-250 $\mu\text{m}$  | 18  | 51 | 2.0  | 20  | 5.6  | 2.3  | <0.1 | <0.1 | 2.0  |
|    | 63-80 $\mu\text{m}$   | 20  | 55 | 1.7  | 12  | 8.2  | 1.3  | <0.1 | <0.1 | 1.3  |
|    | 40-63 $\mu\text{m}$   | 14  | 47 | 2.3  | 25  | 5.9  | 3.2  | <0.1 | <0.1 | 2.5  |
|    | 20-40 $\mu\text{m}$   | 14  | 45 | 3.7  | 27  | 4.7  | 3.2  | <0.1 | <0.1 | 1.5  |
|    | <20 $\mu\text{m}$     | 17  | 47 | 5.6  | 22  | 4.4  | 2.6  | <0.1 | <0.1 | 1.9  |
| 48 | 250-500 $\mu\text{m}$ | 23  | 53 | 3.3  | 8.3 | 2.6  | 0.83 | 7.7  | <0.1 | 1.3  |
|    | 80-250 $\mu\text{m}$  | 18  | 52 | 1.9  | 13  | 4.8  | 0.74 | 9.5  | <0.1 | 0.24 |
|    | 63-80 $\mu\text{m}$   | 2.6 | 60 | 1.4  | 20  | 6.4  | 1.3  | 6.4  | <0.1 | 1.5  |
|    | 40-63 $\mu\text{m}$   | 6.5 | 42 | 5.8  | 21  | 8.0  | 3.1  | 11   | <0.1 | 2.1  |
|    | 20-40 $\mu\text{m}$   | 12  | 37 | 6.8  | 25  | 4.0  | 2.2  | 12   | <0.1 | 1.4  |
|    | <20 $\mu\text{m}$     | 3.4 | 42 | 9.1  | 29  | 3.8  | 1.5  | 10   | <0.1 | 0.95 |
| 50 | 250-500 $\mu\text{m}$ | 37  | 50 | 1.6  | 7.3 | 2.1  | 0.91 | <0.1 | <0.1 | 0.83 |
|    | 80-250 $\mu\text{m}$  | 24  | 58 | 1.9  | 8.3 | 6.2  | 0.95 | <0.1 | <0.1 | 1.2  |
|    | 63-80 $\mu\text{m}$   | 17  | 50 | 4.5  | 14  | 9.3  | 3.9  | <0.1 | <0.1 | 2.1  |
|    | 40-63 $\mu\text{m}$   | 15  | 47 | 3.8  | 19  | 12   | 2.5  | <0.1 | <0.1 | 0.69 |
|    | 20-40 $\mu\text{m}$   | 18  | 32 | 7.7  | 28  | 6.5  | 4.8  | <0.1 | <0.1 | 3.3  |
|    | <20 $\mu\text{m}$     | 13  | 39 | 11   | 28  | 3.2  | 4.2  | <0.1 | <0.1 | 1.4  |
| 52 | 250-500 $\mu\text{m}$ | 12  | 48 | 4.1  | 29  | 3.1  | 2.5  | <0.1 | <0.1 | 1.2  |
|    | 80-250 $\mu\text{m}$  | 9.9 | 48 | 5.7  | 28  | 4.5  | 1.4  | <0.1 | <0.1 | 1.9  |
|    | 63-80 $\mu\text{m}$   | 3.6 | 48 | 4.4  | 32  | 8.5  | 2.1  | <0.1 | <0.1 | 1.4  |
|    | 40-63 $\mu\text{m}$   | 11  | 43 | 5.6  | 29  | 8.1  | 1.6  | <0.1 | <0.1 | 1.9  |
|    | 20-40 $\mu\text{m}$   | 5.5 | 43 | 7.9  | 39  | 1.3  | 1.3  | <0.1 | <0.1 | 1.9  |
|    | <20 $\mu\text{m}$     | 13  | 42 | 7.4  | 31  | 1.7  | 2.0  | <0.1 | <0.1 | 3.4  |
| 53 | 250-500 $\mu\text{m}$ | 13  | 49 | 6.6  | 18  | 5.5  | 5.7  | 1.3  | <0.1 | 0.60 |
|    | 80-250 $\mu\text{m}$  | 18  | 43 | 4.7  | 16  | 10   | 6.0  | 1.1  | <0.1 | 1.9  |
|    | 63-80 $\mu\text{m}$   | 11  | 45 | 5.8  | 22  | 8.1  | 6.5  | 0.72 | <0.1 | 1.1  |
|    | 40-63 $\mu\text{m}$   | 9.3 | 47 | 5.1  | 24  | 8.5  | 5.6  | 0.45 | <0.1 | 1.0  |
|    | 20-40 $\mu\text{m}$   | 10  | 35 | 10   | 27  | 7.6  | 7.8  | 1.2  | <0.1 | 1.3  |
|    | <20 $\mu\text{m}$     | 9.8 | 34 | 13   | 28  | 4.8  | 8.6  | 0.95 | <0.1 | 1.3  |
| 55 | 250-500 $\mu\text{m}$ | 51  | 46 | <0.1 | 2.6 | 0.46 | <0.1 | <0.1 | <0.1 | 0.40 |
|    | 80-250 $\mu\text{m}$  | 42  | 50 | <0.1 | 5.5 | 1.9  | <0.1 | <0.1 | <0.1 | 0.16 |
|    | 63-80 $\mu\text{m}$   | 30  | 54 | <0.1 | 3.7 | 12   | <0.1 | <0.1 | <0.1 | 0.59 |
|    | 40-63 $\mu\text{m}$   | 28  | 53 | <0.1 | 5.1 | 13   | <0.1 | <0.1 | <0.1 | 0.83 |

Table S5. Summarised results of the Fe mode of occurrence from Mojave Desert samples. N° is the sample number, FeT is the total Fe content in weight %, FeA is the exchangeable Fe and nano Fe oxides in weight %, FeD is the Fe in hematite and goethite in weight %, FeM is the Fe in magnetite in weight %, FeS is the Fe in Fe bearing minerals in weight %. The FeA %, FeD %, FeM %, FeS % are the percentage of Fe that is in that mode of occurrence according to the total Fe amount.

| N° | FeT  | FeA   | FeD   | FeM   | FeS   | FeA % | FeD % | FeM % | FeS % |
|----|------|-------|-------|-------|-------|-------|-------|-------|-------|
| 1  | 3.64 | 0.06  | 0.473 | 0.038 | 3.069 | 1.6   | 13    | 1.0   | 84    |
| 2  | 1.38 | 0.02  | 0.207 | 0.016 | 1.137 | 1.4   | 15    | 1.2   | 82    |
| 3  | 3.09 | 0.06  | 0.467 | 0.028 | 2.535 | 1.9   | 15    | 0.92  | 82    |
| 4  | 1.36 | 0.02  | 0.181 | 0.015 | 1.144 | 1.5   | 13    | 1.1   | 84    |
| 5  | 2.54 | 0.04  | 0.347 | 0.022 | 2.131 | 1.6   | 14    | 0.87  | 84    |
| 6  | 1.19 | 0.02  | 0.146 | 0.021 | 1.003 | 1.7   | 12    | 1.8   | 84    |
| 7  | 5.24 | 0.21  | 0.839 | 0.096 | 4.095 | 4.0   | 16    | 1.8   | 78    |
| 8  | 3.4  | 0.05  | 0.492 | 0.066 | 2.792 | 1.5   | 14    | 1.9   | 82    |
| 9  | 2.08 | 0.05  | 0.27  | 0.036 | 1.724 | 2.4   | 13    | 1.7   | 83    |
| 10 | 1.38 | 0.017 | 0.165 | 0.02  | 1.178 | 1.2   | 12    | 1.4   | 85    |
| 11 | 2.02 | 0.019 | 0.323 | 0.086 | 1.592 | 0.94  | 16    | 4.3   | 79    |
| 12 | 1.77 | 0.025 | 0.331 | 0.079 | 1.335 | 1.4   | 19    | 4.5   | 75    |
| 14 | 0.77 | 0.026 | 0.163 | 0.025 | 0.556 | 3.4   | 21    | 3.2   | 72    |
| 15 | 0.28 | 0.016 | 0.057 | 0.012 | 0.195 | 5.7   | 20    | 4.3   | 70    |
| 16 | 1.06 | 0.029 | 0.257 | 0.051 | 0.723 | 2.7   | 24    | 4.8   | 68    |
| 17 | 1.4  | 0.021 | 0.281 | 0.035 | 1.063 | 1.5   | 20    | 2.5   | 76    |
| 18 | 2    | 0.031 | 0.434 | 0.098 | 1.437 | 1.6   | 22    | 4.9   | 72    |
| 19 | 2.18 | 0.021 | 0.481 | 0.042 | 1.636 | 0.96  | 22    | 1.9   | 75    |
| 20 | 1.72 | 0.022 | 0.313 | 0.071 | 1.314 | 1.3   | 18    | 4.1   | 76    |
| 21 | 4.85 | 0.068 | 1.429 | 0.04  | 3.313 | 1.4   | 29    | 0.82  | 68    |
| 22 | 4.37 | 0.054 | 0.693 | 0.081 | 3.542 | 1.2   | 16    | 1.9   | 81    |
| 23 | 2.45 | 0.019 | 0.324 | 0.112 | 1.995 | 0.78  | 13    | 4.6   | 81    |

|    |      |       |       |       |       |      |     |      |    |
|----|------|-------|-------|-------|-------|------|-----|------|----|
| 24 | 1.48 | 0.021 | 0.144 | 0.096 | 1.219 | 1.4  | 9.7 | 6.5  | 82 |
| 25 | 2.22 | 0.021 | 0.228 | 0.014 | 1.957 | 0.95 | 10  | 0.63 | 88 |
| 26 | 1.37 | 0.01  | 0.134 | 0.046 | 1.18  | 0.73 | 9.8 | 3.4  | 86 |
| 27 | 2.04 | 0.012 | 0.182 | 0.013 | 1.833 | 0.59 | 8.9 | 0.64 | 90 |
| 28 | 1.12 | 0.011 | 0.107 | 0.024 | 0.978 | 0.98 | 9.6 | 2.1  | 87 |
| 29 | 1.52 | 0.015 | 0.161 | 0.029 | 1.315 | 0.99 | 11  | 1.9  | 87 |
| 30 | 3.07 | 0.036 | 0.418 | 0.041 | 2.575 | 1.2  | 14  | 1.3  | 84 |
| 31 | 2.5  | 0.024 | 0.315 | 0.03  | 2.131 | 0.96 | 13  | 1.2  | 85 |
| 32 | 3.79 | 0.03  | 0.577 | 0.057 | 3.126 | 0.79 | 15  | 1.5  | 82 |
| 33 | 4.01 | 0.034 | 0.572 | 0.031 | 3.373 | 0.85 | 14  | 0.77 | 84 |
| 34 | 3.72 | 0.029 | 0.561 | 0.064 | 3.066 | 0.78 | 15  | 1.7  | 82 |
| 35 | 3.78 | 0.043 | 0.565 | 0.035 | 3.137 | 1.14 | 15  | 0.93 | 83 |
| 36 | 2.73 | 0.026 | 0.374 | 0.057 | 2.273 | 0.95 | 14  | 2.1  | 83 |
| 37 | 4.15 | 0.083 | 0.588 | 0.059 | 3.42  | 2.0  | 14  | 1.4  | 82 |
| 38 | 2.34 | 0.041 | 0.306 | 0.029 | 1.964 | 1.8  | 13  | 1.2  | 84 |
| 39 | 0.56 | 0.005 | 0.037 | 0.014 | 0.504 | 0.89 | 6.6 | 2.5  | 90 |
| 40 | 0.52 | 0.004 | 0.044 | 0.007 | 0.465 | 0.77 | 8.5 | 1.3  | 89 |
| 41 | 0.8  | 0.005 | 0.067 | 0.031 | 0.697 | 0.62 | 8.4 | 3.9  | 87 |
| 42 | 3.63 | 0.108 | 0.891 | 0.098 | 2.533 | 3.0  | 25  | 2.7  | 70 |
| 43 | 4.69 | 0.102 | 0.811 | 0.095 | 3.682 | 2.2  | 17  | 2.0  | 79 |
| 44 | 5.15 | 0.113 | 0.945 | 0.099 | 3.993 | 2.2  | 18  | 1.9  | 78 |
| 45 | 5.26 | 0.125 | 0.961 | 0.1   | 4.074 | 2.4  | 18  | 1.9  | 77 |
| 46 | 4.26 | 0.106 | 0.643 | 0.044 | 3.467 | 2.5  | 15  | 1.0  | 81 |
| 47 | 3.41 | 0.055 | 0.243 | 0.026 | 3.086 | 1.6  | 7.1 | 0.76 | 90 |
| 48 | 2.81 | 0.049 | 0.43  | 0.076 | 2.255 | 1.7  | 15  | 2.7  | 80 |

|    |      |       |       |       |       |      |     |      |    |
|----|------|-------|-------|-------|-------|------|-----|------|----|
| 49 | 3.55 | 0.064 | 0.614 | 0.052 | 2.82  | 1.8  | 17  | 1.5  | 79 |
| 50 | 2.09 | 0.028 | 0.327 | 0.042 | 1.693 | 1.3  | 16  | 2.0  | 81 |
| 51 | 1.25 | 0.014 | 0.253 | 0.061 | 0.922 | 1.1  | 20  | 4.9  | 74 |
| 52 | 2.09 | 0.099 | 1.05  | 0.102 | 0.839 | 4.7  | 50  | 4.9  | 40 |
| 53 | 3.52 | 0.065 | 0.501 | 0.085 | 2.869 | 1.8  | 14  | 2.4  | 82 |
| 54 | 1.25 | 0.043 | 0.319 | 0.037 | 0.851 | 3.4  | 26  | 3.0  | 68 |
| 55 | 3.52 | 0.017 | 0.12  | 0.006 | 3.377 | 0.48 | 3.4 | 0.17 | 96 |
| 56 | 5.29 | 0.021 | 0.164 | 0.024 | 5.081 | 0.40 | 3.1 | 0.45 | 96 |
